# Supplementary material for: Intrapleural interleukin-2–expressing oncolytic virotherapy enhances acute antitumor effects and T-cell receptor diversity in malignant pleural disease
Source: PubMed Central journal article supplement — J Thorac Cardiovasc Surg. Author manuscript; Available in PMC 2022 Oct 25. (PMC9594625; doi:10.1016/j.jtcvs.2020.11.160), 2020-12-13
Supplement: NIHMS1835651-supplement-1.pdf [file NIHMS1835651-supplement-1.pdf]

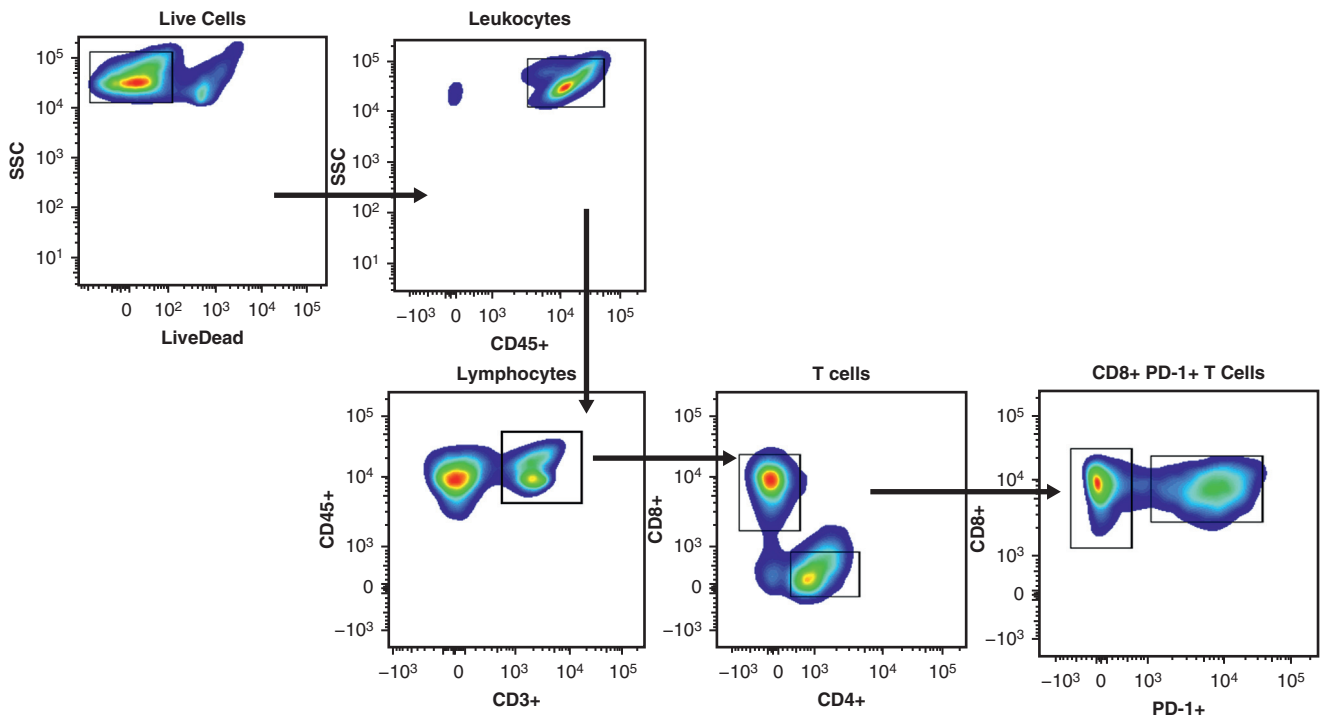

**FIGURE E1.** Flow cytometric gating strategy. Successive gating strategy used to identify cell types from sized, viable leukocytes, lymphocyte, T-cell subtypes, and programmed cell death protein 1 positivity on CD8<sup>+</sup> T cells.

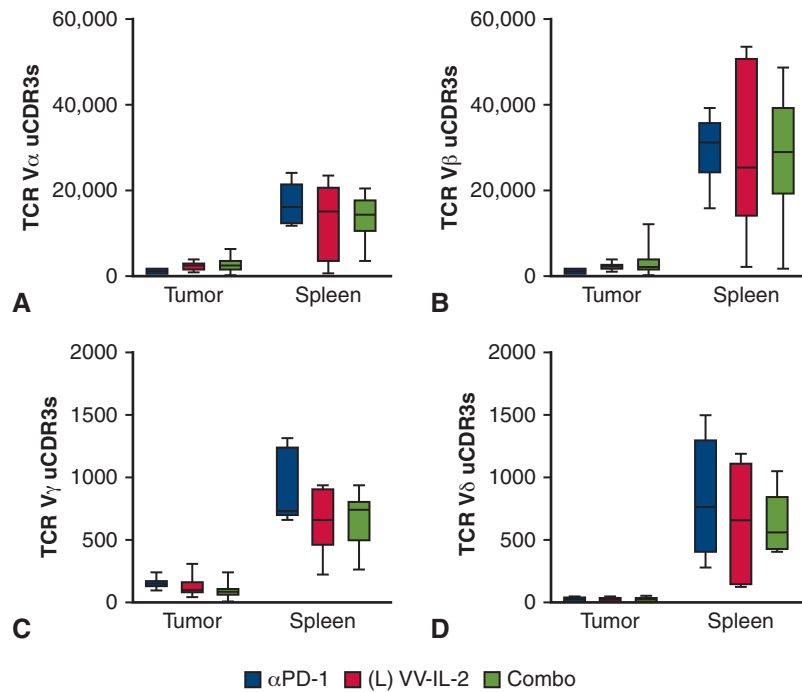

**FIGURE E2.** Nonsignificant change in intratumoral and splenic CDR3s with VV-IL-2 and combination treatment. Unique CDR3 mRNA expression for V $\alpha$  (A), V $\beta$  (B), V $\gamma$  (C), and V $\delta$  (D) chains in tumor and spleen from MPD mice treated with systemic anti-PD-1 alone (n = 7), intrapleural VV-IL-2 alone (n = 9), or combination anti-PD-1 and VV-IL-2 (n = 8).

THOR

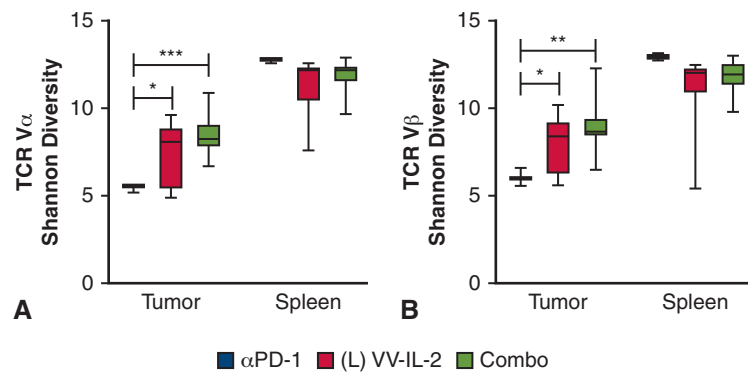

**FIGURE E3.** VV-IL-2 and combination treatment increase TIL Shannon diversity index.  $V\alpha$  (A) and  $V\beta$  (B) Shannon diversity index were assessed in tumor and spleen from MPD mice treated with systemic anti-PD-1 alone ( $n = 7$ ), intrapleural VV-IL-2 alone ( $n = 9$ ), or combination anti-PD-1 and VV-IL-2 ( $n = 8$ ).  $P$  values are reported ( $*P < .05$ ,  $**P < .01$ ,  $***P < .001$ ).
